# Supplementary material for: Oxidative desulfurization of DBT with H2O2catalysed by TiO2/porous glass
Source: Royal Society of Chemistry journal article supplement (doi:10.1039/c5gc01653c), 2015-09-01
Supplement: c5gc01653c1.pdf [file c5gc01653c1.pdf]

**Title:** Oxidative desulfurization of DBT with H<sub>2</sub>O<sub>2</sub> catalysed by TiO<sub>2</sub>/porous glass

**Authors:** C. Shen<sup>†</sup>, Y. J. Wang<sup>\*,‡</sup>, J. H. Xu<sup>‡</sup>, and G. S. Luo<sup>\*,‡</sup>

**Affiliations:**

<sup>†</sup>Beijing Key Laboratory of Bioprocess, College of Life Science and Technology,  
Beijing University of Chemical Technology, Beijing 100029, China

<sup>‡</sup>The State Key Laboratory of Chemical Engineering, Department of Chemical  
Engineering, Tsinghua University, Beijing 100084, China

Corresponding author: Tel: 86-010-62788568, Fax: 86-010-62788568

Email address: wangyujun@mail.tsinghua.edu.cn and gsluo@tsinghua.edu.cn

**Supporting material**

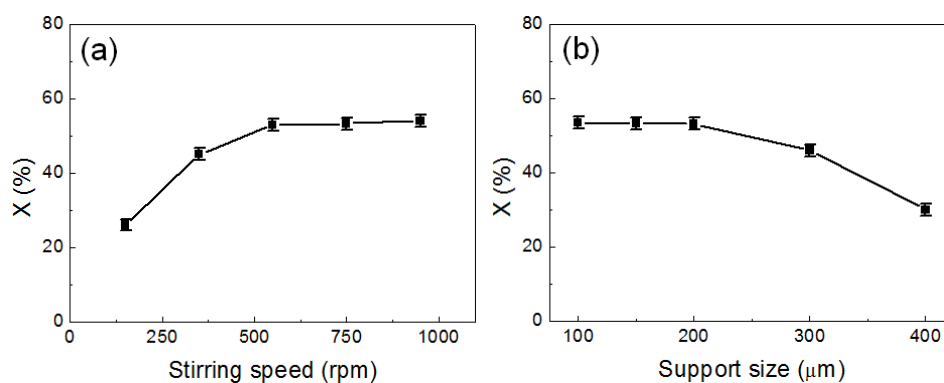

Figure S1. (a) Effect of stirring speed on DBT conversion (support size: 100  $\mu\text{m}$ ; Ti content: 3.67 wt.%; reaction temperature: 333 k; 1.0 g catalyst; molar ratio of  $\text{H}_2\text{O}_2$ -to-DBT: 10; initial concentration of DBT: 150 ppm; reaction duration: 1 min); (b) effect of support size on DBT conversion (stirring speed: 750 rpm; Ti content: 3.67 wt.%; reaction temperature: 333 k; 1.0 g catalyst; molar ratio of  $\text{H}_2\text{O}_2$ -to-DBT: 10; initial concentration of DBT: 150 ppm; reaction duration: 1 min)

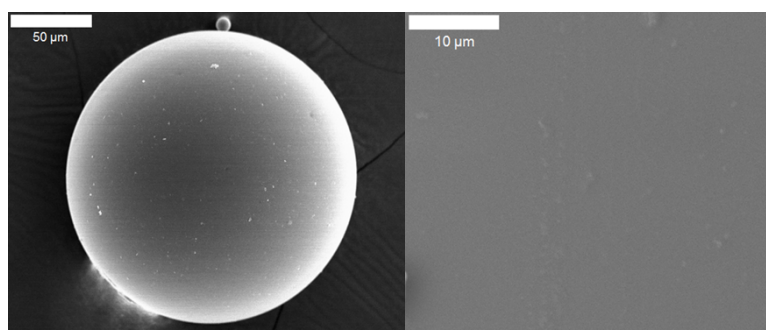

Figure S2. Surface morphologies of glass beads before subcritical water treatment

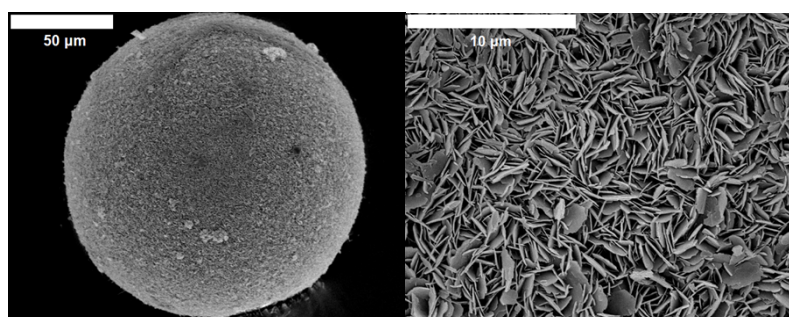

Figure S3. Surface morphologies of glass beads after subcritical water treatment

Table S1. BET results of glass beads before and after the subcritical water treatment

| Sample           | Surface area<br>( $\text{m}^2/\text{g}$ ) | Pore volume<br>( $\text{mL}/\text{g}$ ) | Mean pore size<br>(nm) |
|------------------|-------------------------------------------|-----------------------------------------|------------------------|
| Before treatment | $2.9 \times 10^{-3}$                      | /                                       | /                      |
| After treatment  | 162.6                                     | $2.58 \times 10^{-1}$                   | 6.34                   |

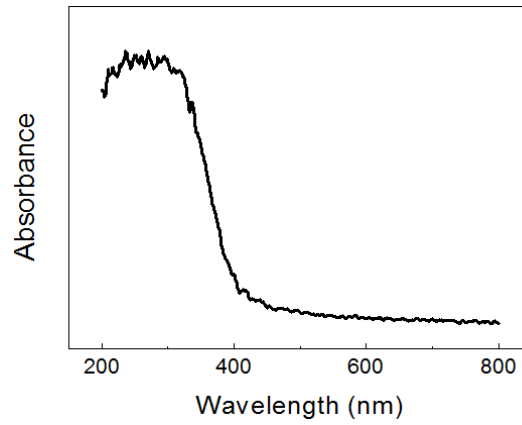

Figure S4. UV-vis absorption spectra of porous glass supported with TiO<sub>2</sub>

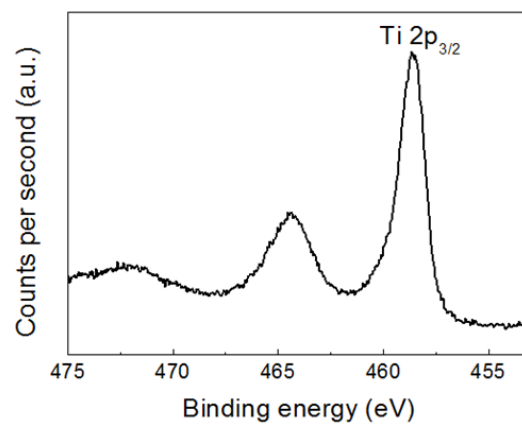

Figure S5. XPS spectra of the TiO<sub>2</sub>-decorated porous glass beads

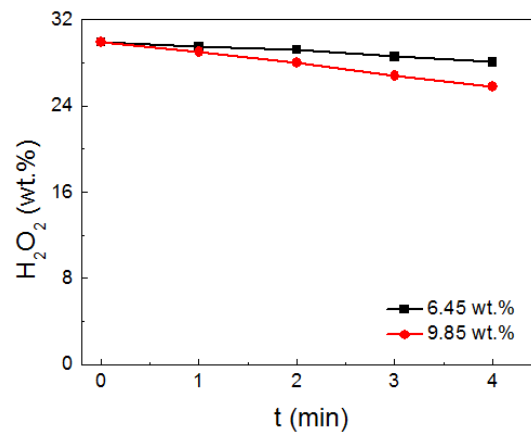

Figure S6. H<sub>2</sub>O<sub>2</sub> decomposition rate using catalysts with different Ti content

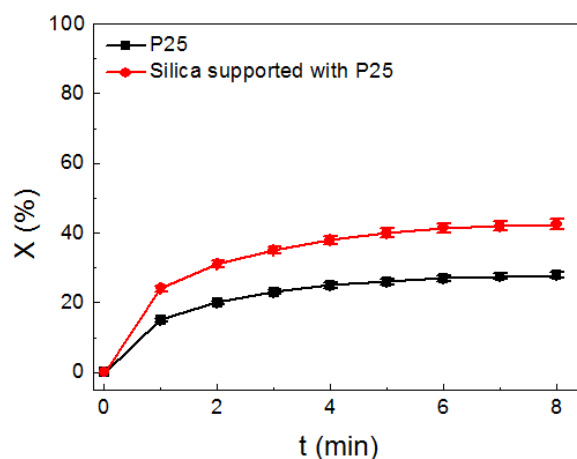

Figure S7. Catalytic activity of P25 and silica supported with P25; reaction temperature: 333 K; TiO<sub>2</sub> amount: 0.1 g; molar ratio of H<sub>2</sub>O<sub>2</sub>-to-DBT: 10; initial concentration of DBT: 150 ppm

Preparation of TiO<sub>2</sub> powder:

12.5 mL of Ti(OBu)<sub>4</sub> was added to 33.3 mL of ethanol and the solution was stirred for 10 min. Then a certain amount of concentrated hydrochloric acid was added (the pH value of the solution was 1.6) and stirred for another 30 min. The mixture of 16.7 mL of ethanol and 1.5 mL of deionized water was added dropwise afterwards. Then the mixture was stirred for another 3 h at 353 K to form the gel and calcined at 773 K for 2 h with a heating speed of 1 K/min.

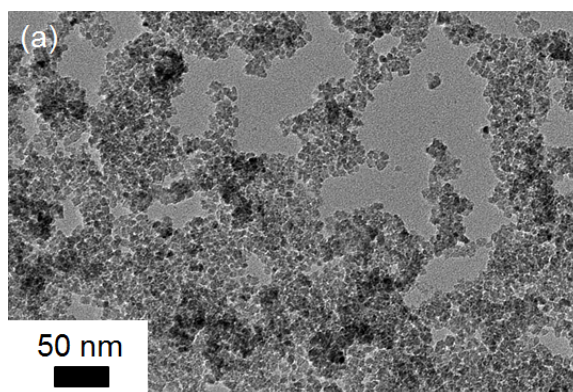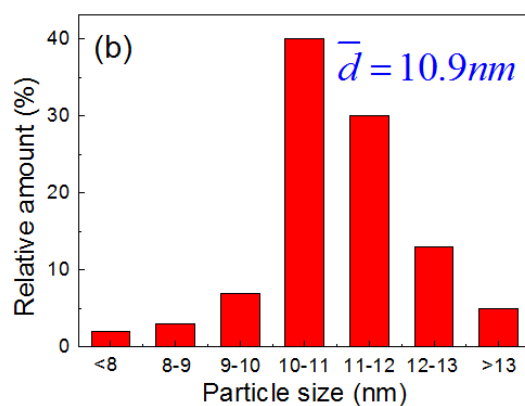

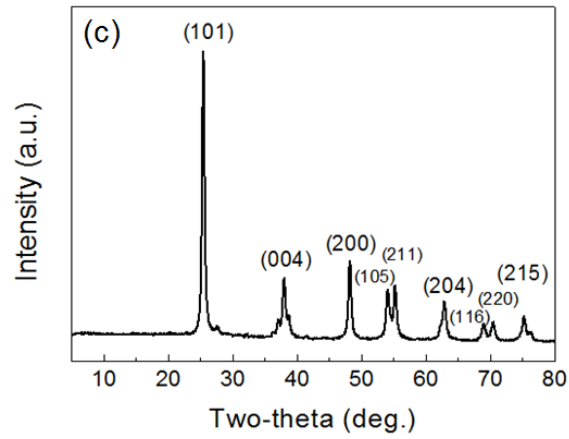

Figure S8. (a) TEM image of the as-prepared TiO<sub>2</sub> powder; (b) corresponding histogram of particle size distribution of the as-prepared TiO<sub>2</sub> powder; (c) XRD pattern of the as-prepared TiO<sub>2</sub> powder
